# Supplementary material for: Importance of depth and temperature variability as drivers of coral symbiont composition despite a mass bleaching event
Source: PubMed Central journal article supplement (PMC10238383; doi:10.1038/s41598-023-35425-9), 2023-06-02
Supplement: 41598_2023_35425_MOESM1_ESM.pdf [file 41598_2023_35425_MOESM1_ESM.pdf]

# Supplemental material

A

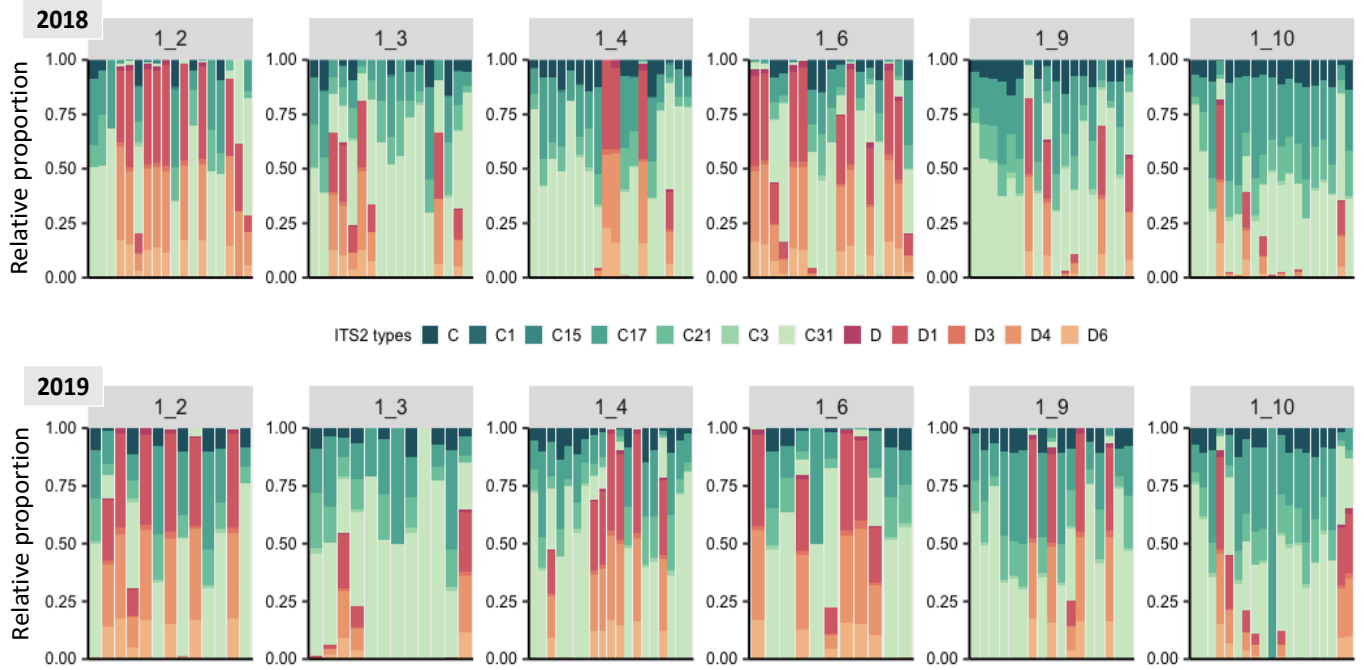

B

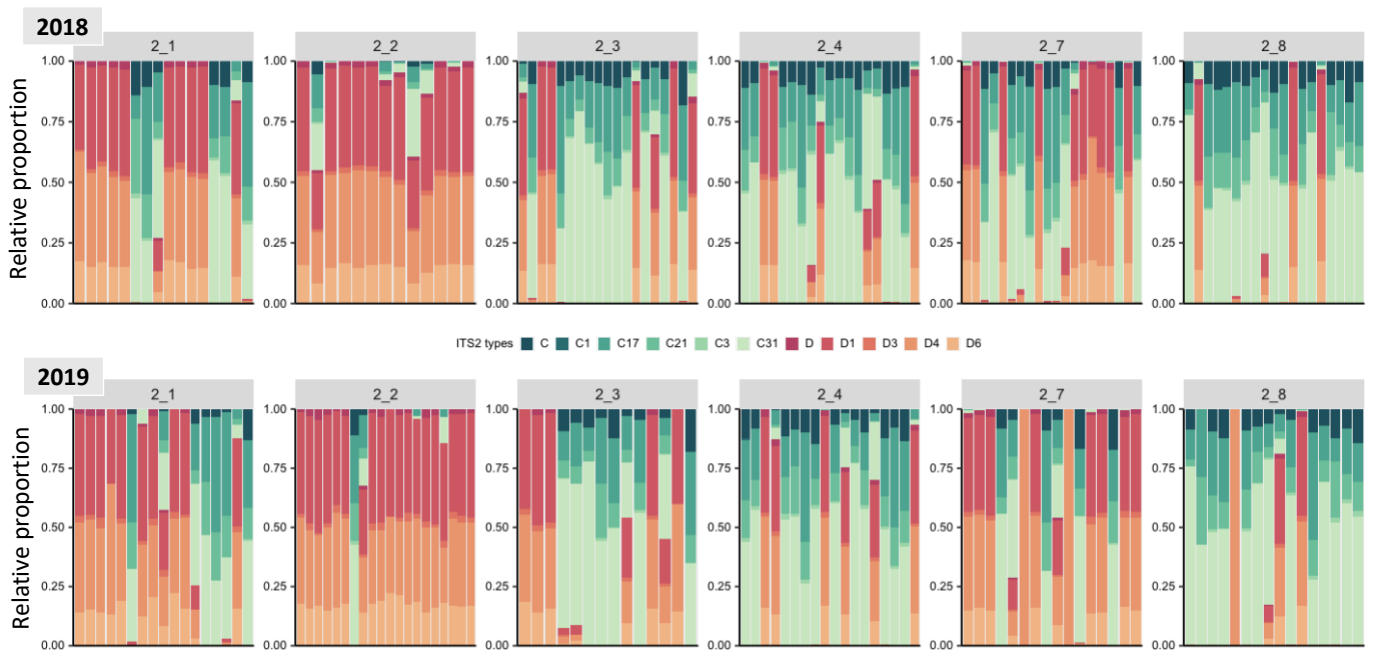

C

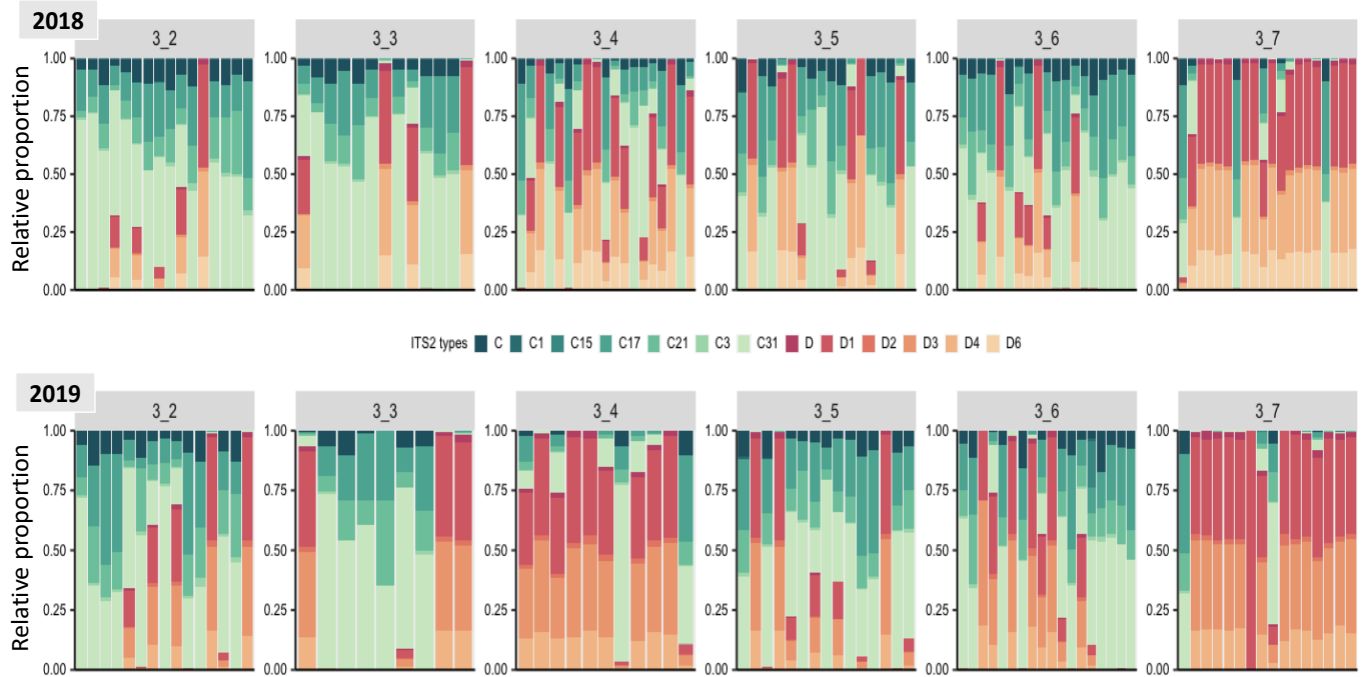

D

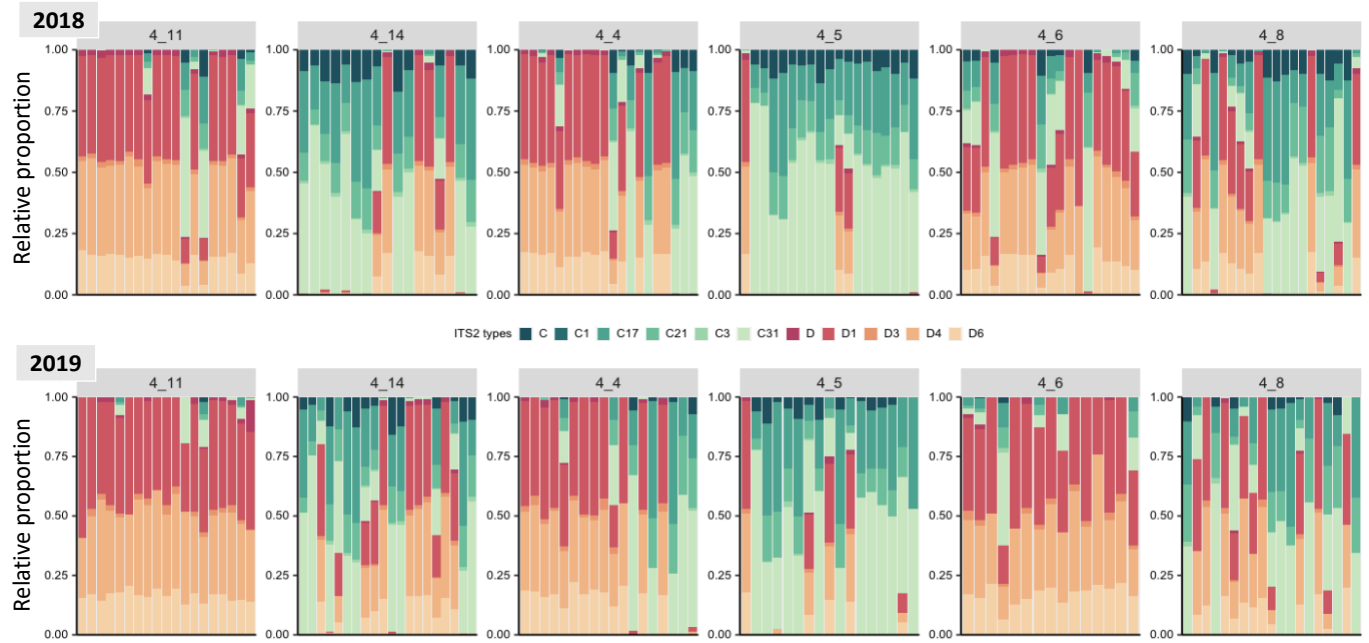

E

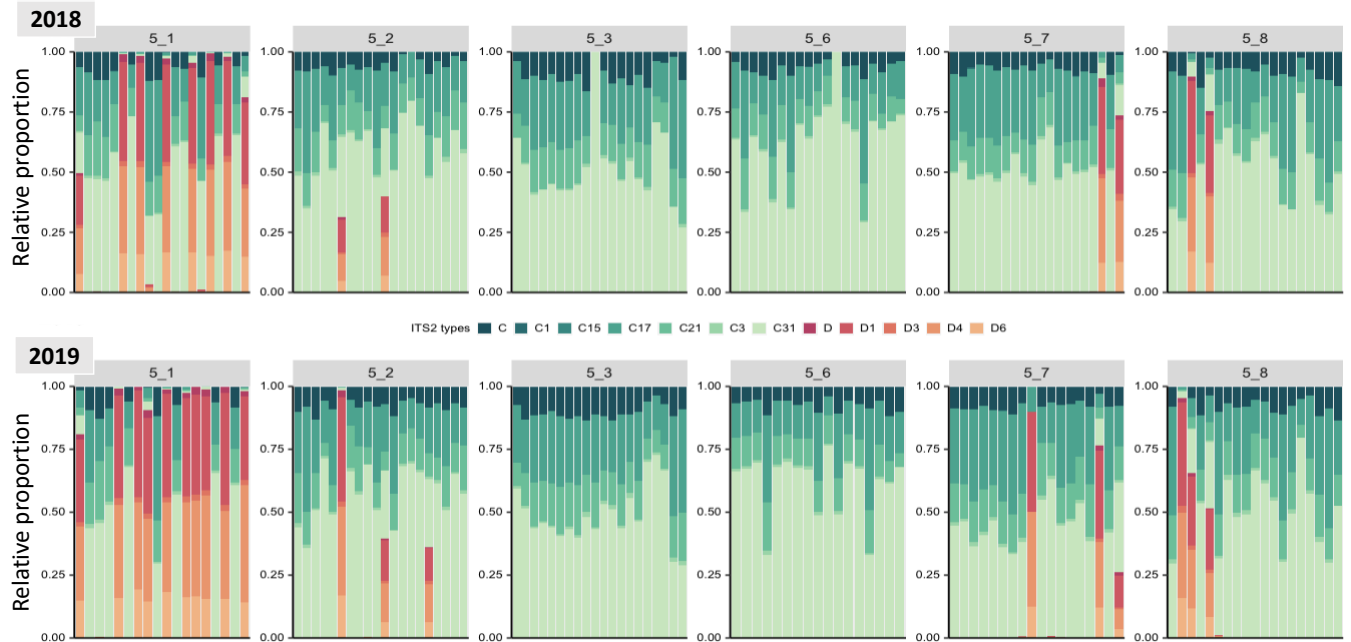

**Figure 1.** Relative proportion of Symbiodiniaceae types present in each *Montipora capitata* colony in each site in 2018 and 2019. Panels shows the different sites in each of one the blocks - block 1 (A), block 2 (B), block 3 (C), block 4 (D), block 5 (E).

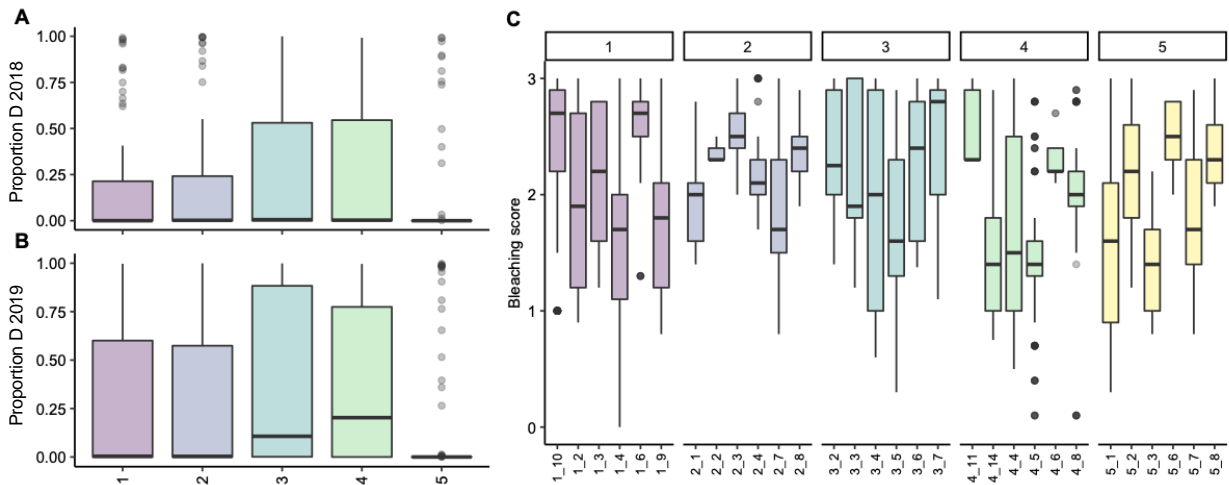

**Figure 2.** Proportion of *Durusdinium* per block in A) 2018 and B) 2019. C) Bleaching score per site.

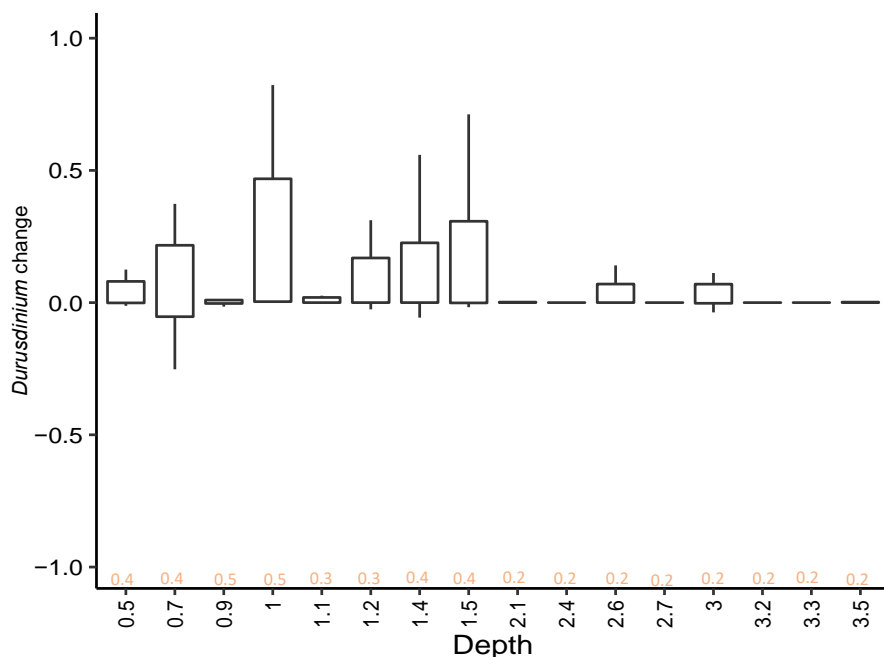

**Figure 3.** Difference in the proportion of *Durusdinium* (D) in 2019 when compared to the proportion present in 2018 plotted by site depth (in meters). Mean daily temperature standard deviation for each depth are shown above each depth.

**Table 1.** Site information, sedimentation, and comparison of temperature for 2018 and 2019.

| Site | Block | Depth (m) | Sedimentation mean g/day | Temperature max 2018 | Temp max 2019 |
|------|-------|-----------|--------------------------|----------------------|---------------|
| 1_2  | 1     | 1.2       | 0.06602                  | 29.3728              | 29.7687       |
| 1_3  | 1     | 3         | 0.02187                  | 28.8250              | 28.6231       |
| 1_4  | 1     | 3.5       | 0.01931                  | 28.8416              | 29.7490       |
| 1_6  | 1     | 0.7       | 0.02287                  | 28.9421              | 30.2274       |
| 1_9  | 1     | 2.6       | 0.02982                  | 28.8125              | 28.7719       |
| 1_10 | 1     | 3         | 0.02928                  | 28.8859              | 28.6366       |
| 2_1  | 2     | 1.2       | 0.16410                  | 28.8539              | 29.4408       |
| 2_2  | 2     | 0.5       | 0.04501                  | 28.8794              | 28.7067       |
| 2_3  | 2     | 0.5       | 0.02779                  | 29.2753              | 30.1186       |
| 2_4  | 2     | 2.4       | 2.93056                  | 28.6209              | 29.0228       |
| 2_7  | 2     | 1.5       | 0.40130                  | 28.7231              | 30.5101       |
| 2_8  | 2     | 2.1       | 0.27611                  | 28.7231              | 28.9946       |

|      |   |     |         |         |         |
|------|---|-----|---------|---------|---------|
| 3_2  | 3 | 1.4 | 0.09804 | 28.1498 | 28.9693 |
| 3_3  | 3 | 1   | 0.05737 | 28.9506 | 28.6542 |
| 3_4  | 3 | 1   | 0.04163 | 29.2845 | 29.4586 |
| 3_5  | 3 | 0.9 | 0.03061 | 29.0320 | 30.1222 |
| 3_6  | 3 | 0.9 | 0.03796 | 28.9826 | 31.9997 |
| 3_7  | 3 | 0.7 | 0.02244 | 29.1680 | 29.6930 |
| 4_4  | 4 | 1.4 | 0.04811 | 28.9492 | 30.0067 |
| 4_5  | 4 | 1.1 | 0.03305 | 28.9298 | 29.6440 |
| 4_6  | 4 | 1.5 | 0.34257 | 29.1865 | 31.1699 |
| 4_8  | 4 | 1.2 | 0.01573 | 28.8363 | 29.9775 |
| 4_11 | 4 | 1.4 | 0.07752 | 29.2206 | 30.1610 |
| 4_14 | 4 | 1.4 | 0.16850 | 28.9260 | 30.0172 |
| 5_1  | 5 | 1.2 | 0.21580 | 29.3822 | 29.7978 |
| 5_2  | 5 | 2.7 | 0.62898 | 28.8171 | 28.5985 |
| 5_3  | 5 | 2.4 | 0.13268 | 28.7982 | 28.5721 |
| 5_6  | 5 | 3.5 | 0.41842 | 27.6119 | 30.0287 |
| 5_7  | 5 | 3.3 | 0.38405 | 28.6961 | 29.6721 |
| 5_8  | 5 | 3.2 | 0.28655 | 28.7486 | 29.6730 |

**Table 2.** Summary statistics per block in 2018 and 2019

| <b>Block</b> | <b>Mean °C 2018</b> | <b>Mean °C 2019</b> | <b>Max °C 2018</b> | <b>Max °C 2019</b> | <b>Daily °C range 2018</b> | <b>Daily °C range 2019</b> | <b>Daily °C standard deviation 2018</b> | <b>Daily °C Standard deviation 2019</b> |
|--------------|---------------------|---------------------|--------------------|--------------------|----------------------------|----------------------------|-----------------------------------------|-----------------------------------------|
| <b>1</b>     | 25.697              | 26.207              | 28.946             | 29.296             | 0.244                      | 1.007                      | 0.243                                   | 0.264                                   |
| <b>2</b>     | 25.647              | 26.265              | 28.834             | 29.465             | 1.246                      | 1.333                      | 0.335                                   | 0.355                                   |
| <b>3</b>     | 25.798              | 26.335              | 28.928             | 29.816             | 1.871                      | 2.014                      | 0.474                                   | 0.505                                   |
| <b>4</b>     | 25.716              | 26.536              | 29.008             | 30.162             | 1.261                      | 1.383                      | 0.342                                   | 0.380                                   |
| <b>5</b>     | 25.490              | 26.159              | 28.675             | 29.390             | 0.746                      | 0.756                      | 0.204                                   | 0.212                                   |
